# Supplementary material for: Dual-site electrocatalytic nitrate reduction to ammonia on oxygen vacancy-enriched and Pd-decorated MnO2 nanosheets
Source: Royal Society of Chemistry journal article supplement (doi:10.1039/d1nr04962c), 2021-01-01
Supplement: d1nr04962c1.pdf [file d1nr04962c1.pdf]

## Electronic Supplementary Information

# Dual-site Electrocatalytic Nitrate Reduction to Ammonia on Oxygen Vacancy-Enriched and Pd-Decorated MnO<sub>2</sub> Nanosheets

*Yan Wang,<sup>a,#</sup> Song Shu,<sup>b,#</sup> Min Peng,<sup>a</sup> Lin Hu,<sup>a</sup> Xiaoshu Lv,<sup>a</sup> Yu Shen,<sup>a</sup> Haifeng Gong,<sup>a</sup> Guangming Jiang<sup>a,\*</sup>*

*<sup>a</sup>Engineering Research Center for Waste Oil Recovery Technology and Equipment, Ministry of Education, Chongqing Technology and Business University, Chongqing 400067, China*

*<sup>b</sup>College of Architecture and Environment, Sichuan University, Chengdu 610065, China*

*\*Corresponding author. Tel.:+86-23-62768316; Fax:+86-23-62768317.*

*# These authors contribute equally to this work.*

E-mail address: [jiangguangming@zju.edu.cn](mailto:jiangguangming@zju.edu.cn) (G.M. Jiang)

## **S1. Characterizations**

X-ray diffraction patterns were recorded on an X-ray diffractometer (XRD, Model D/max RA, Rigaku Co., Japan) with the Cu  $K\alpha$  radiation. The morphology, size, elemental mapping and the crystal lattice fringe of the catalyst were investigated by the transmission electron microscopy (TEM, JEM-2010, JEOL, Japan) and scanning electron microscopy (SEM, Hitachi S-570, Hitachi, Japan) that equipped with an energy dispersive X-ray spectroscopy (EDS). The X-ray photoelectron spectroscopy (XPS) patterns were obtained on the ESCALAB 250 spectrometer (Thermo Fisher Scientific, UK). The NRR tests were controlled using the PARSTAT 3000 electrochemical workstation (Princeton CO., USA). The Pd mass loading on electrode was analyzed by inductively coupled plasma-atomic emission spectroscopy (ICP-AES, ICP2060t, Tianrui, China). The presence of oxygen vacancy in electrode was determined with the combined analyses of XPS and electron paramagnetic resonance (EPR, Bruker ESP 500, Germany). The concentrations of  $\text{NO}_3^-$ -N,  $\text{NO}_2^-$ -N and  $\text{NH}_3$ -N were analyzed by the gas-phase molecular absorption spectrometer (GMA 3370, Beiyu CO., China).

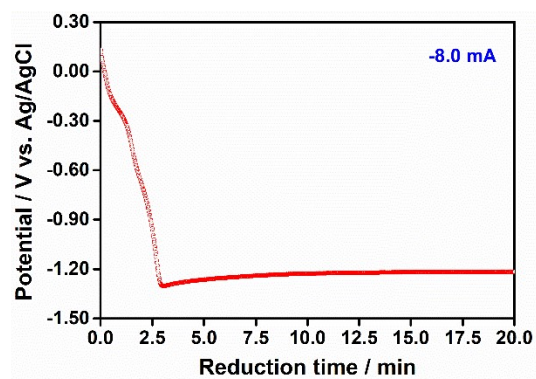

**Fig. S1.** Plotting of the working potential versus the reaction time during the generation of  $O_v$  on the  $MnO_2/Pd$  foam under a current of  $-8.0$  mA.

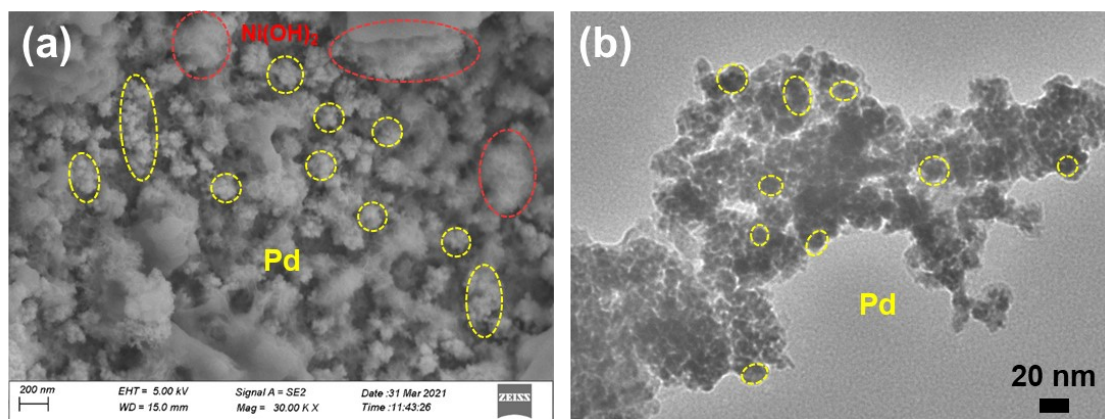

**Fig. S2.** Representative (a) SEM image of the Pd/foam and (b) TEM image of the particle that is scraped from the Pd/Ni foam.

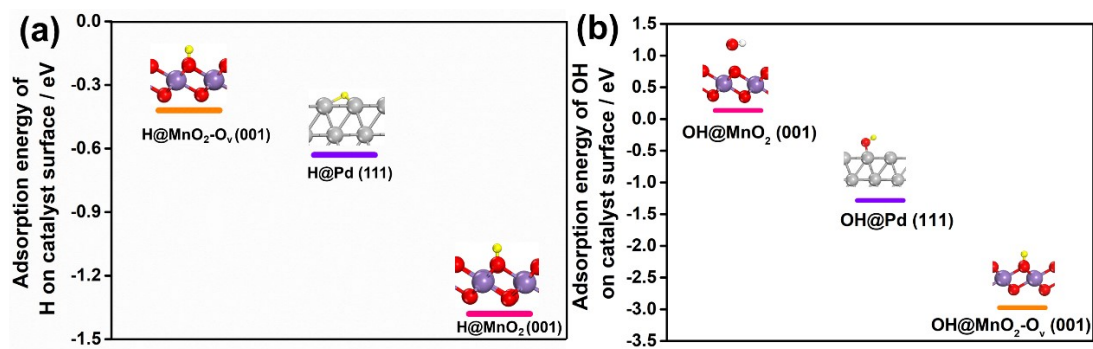

**Fig. S3.** The calculated adsorption energies of H and OH on MnO<sub>2</sub> (001), Pd (111) and MnO<sub>2</sub>-O<sub>v</sub> (001).

**Table S1.** The redox potential for the conversion

| <b>Number</b> | <b>Reaction</b>                                                                  | <b>Redox potential / V vs. NHE</b> |
|---------------|----------------------------------------------------------------------------------|------------------------------------|
| <b>1</b>      | $\text{MnO}_2 + 4\text{H}^+ + \text{e}^- = \text{Mn}^{3+} + 2\text{H}_2\text{O}$ | +0.95                              |
| <b>2</b>      | $\text{MnO}_2 + 4\text{H}^+ + \text{e}^- = \text{Mn}^{2+} + 2\text{H}_2\text{O}$ | +1.23                              |
| <b>3</b>      | $\text{Mn}^{2+} + 2\text{e}^- = \text{Mn}^0$                                     | -1.185                             |
